# Supplementary material for: Hypoxia-induced DTL promotes the proliferation, metastasis, and sorafenib resistance of hepatocellular carcinoma through ubiquitin-mediated degradation of SLTM and subsequent Notch pathway activation
Source: PubMed Central journal article supplement (PMC11464529; doi:10.1038/s41419-024-07089-4), 2024-10-09

## Full unedited blots for figure 2E

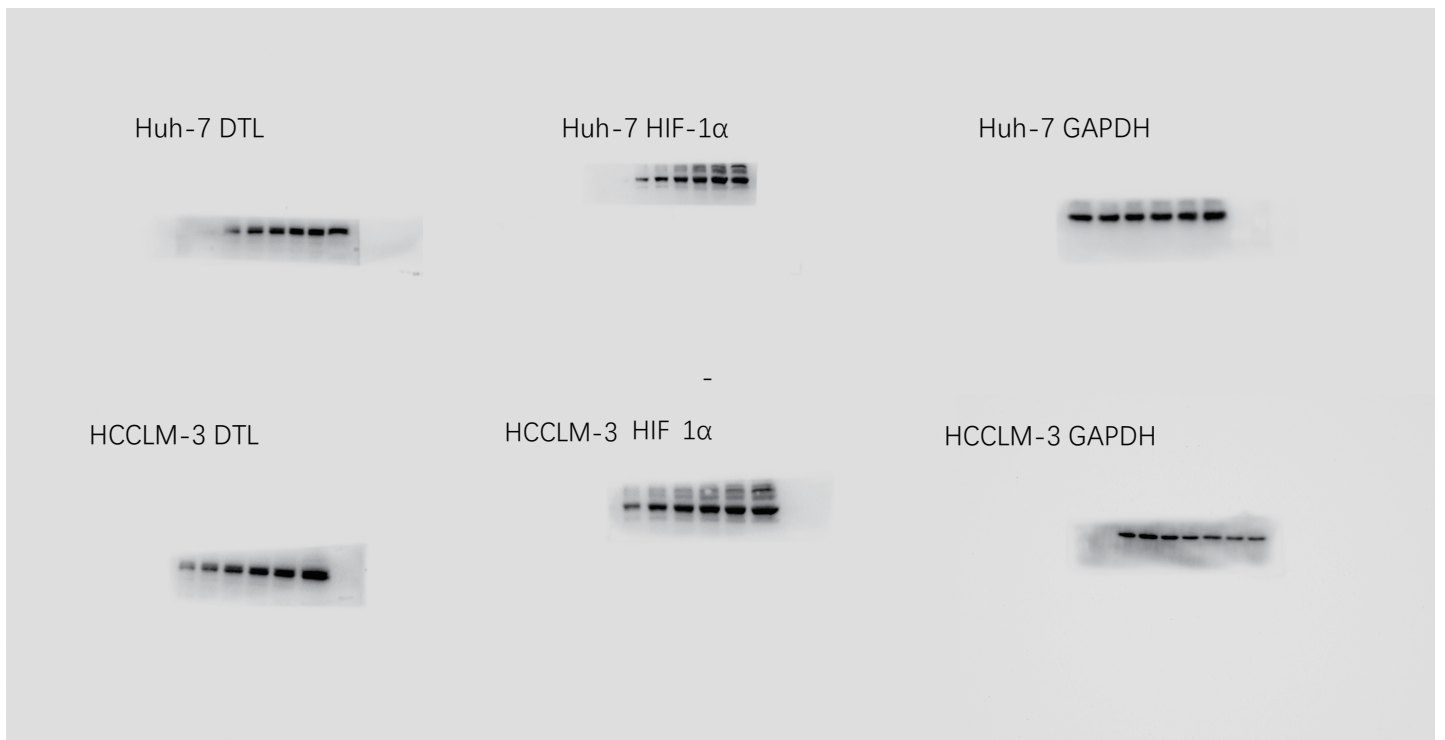

## Full unedited blots for figure 3B

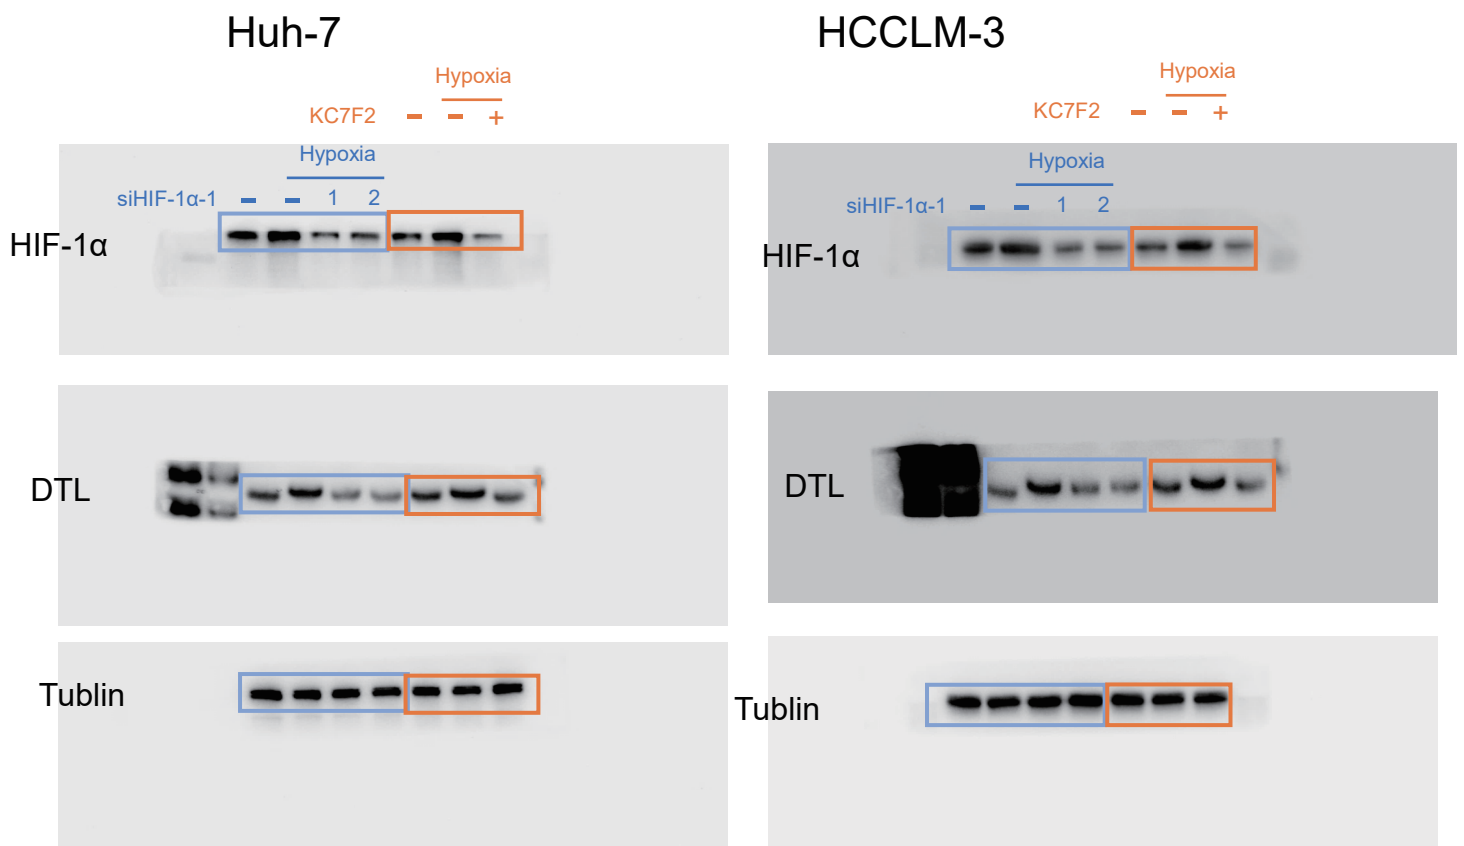

# Full unedited blots for figure 4B

## Huh-7 DTL

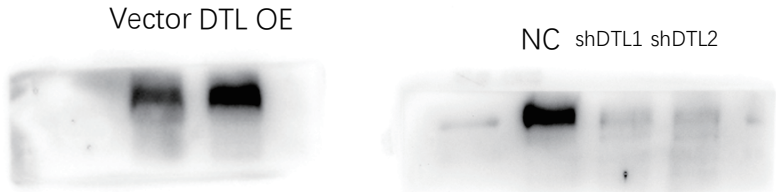

## HCCLM-3 DTL

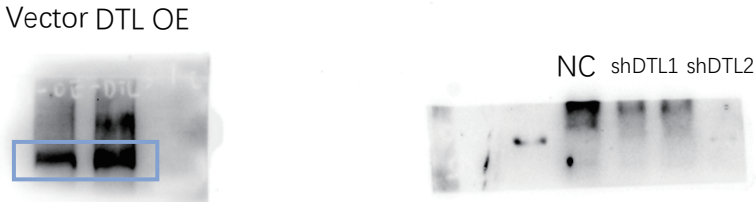

## Huh-7 Tublin

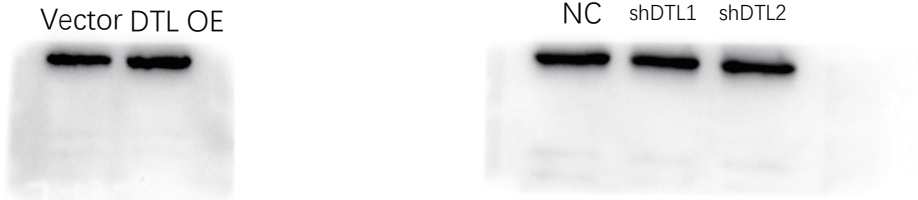

## HCCLM-3 Tublin

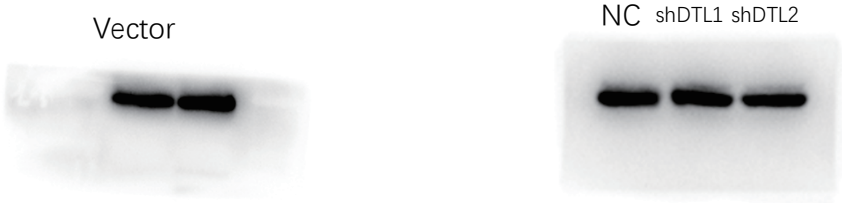

Full unedited blots for figure 7D

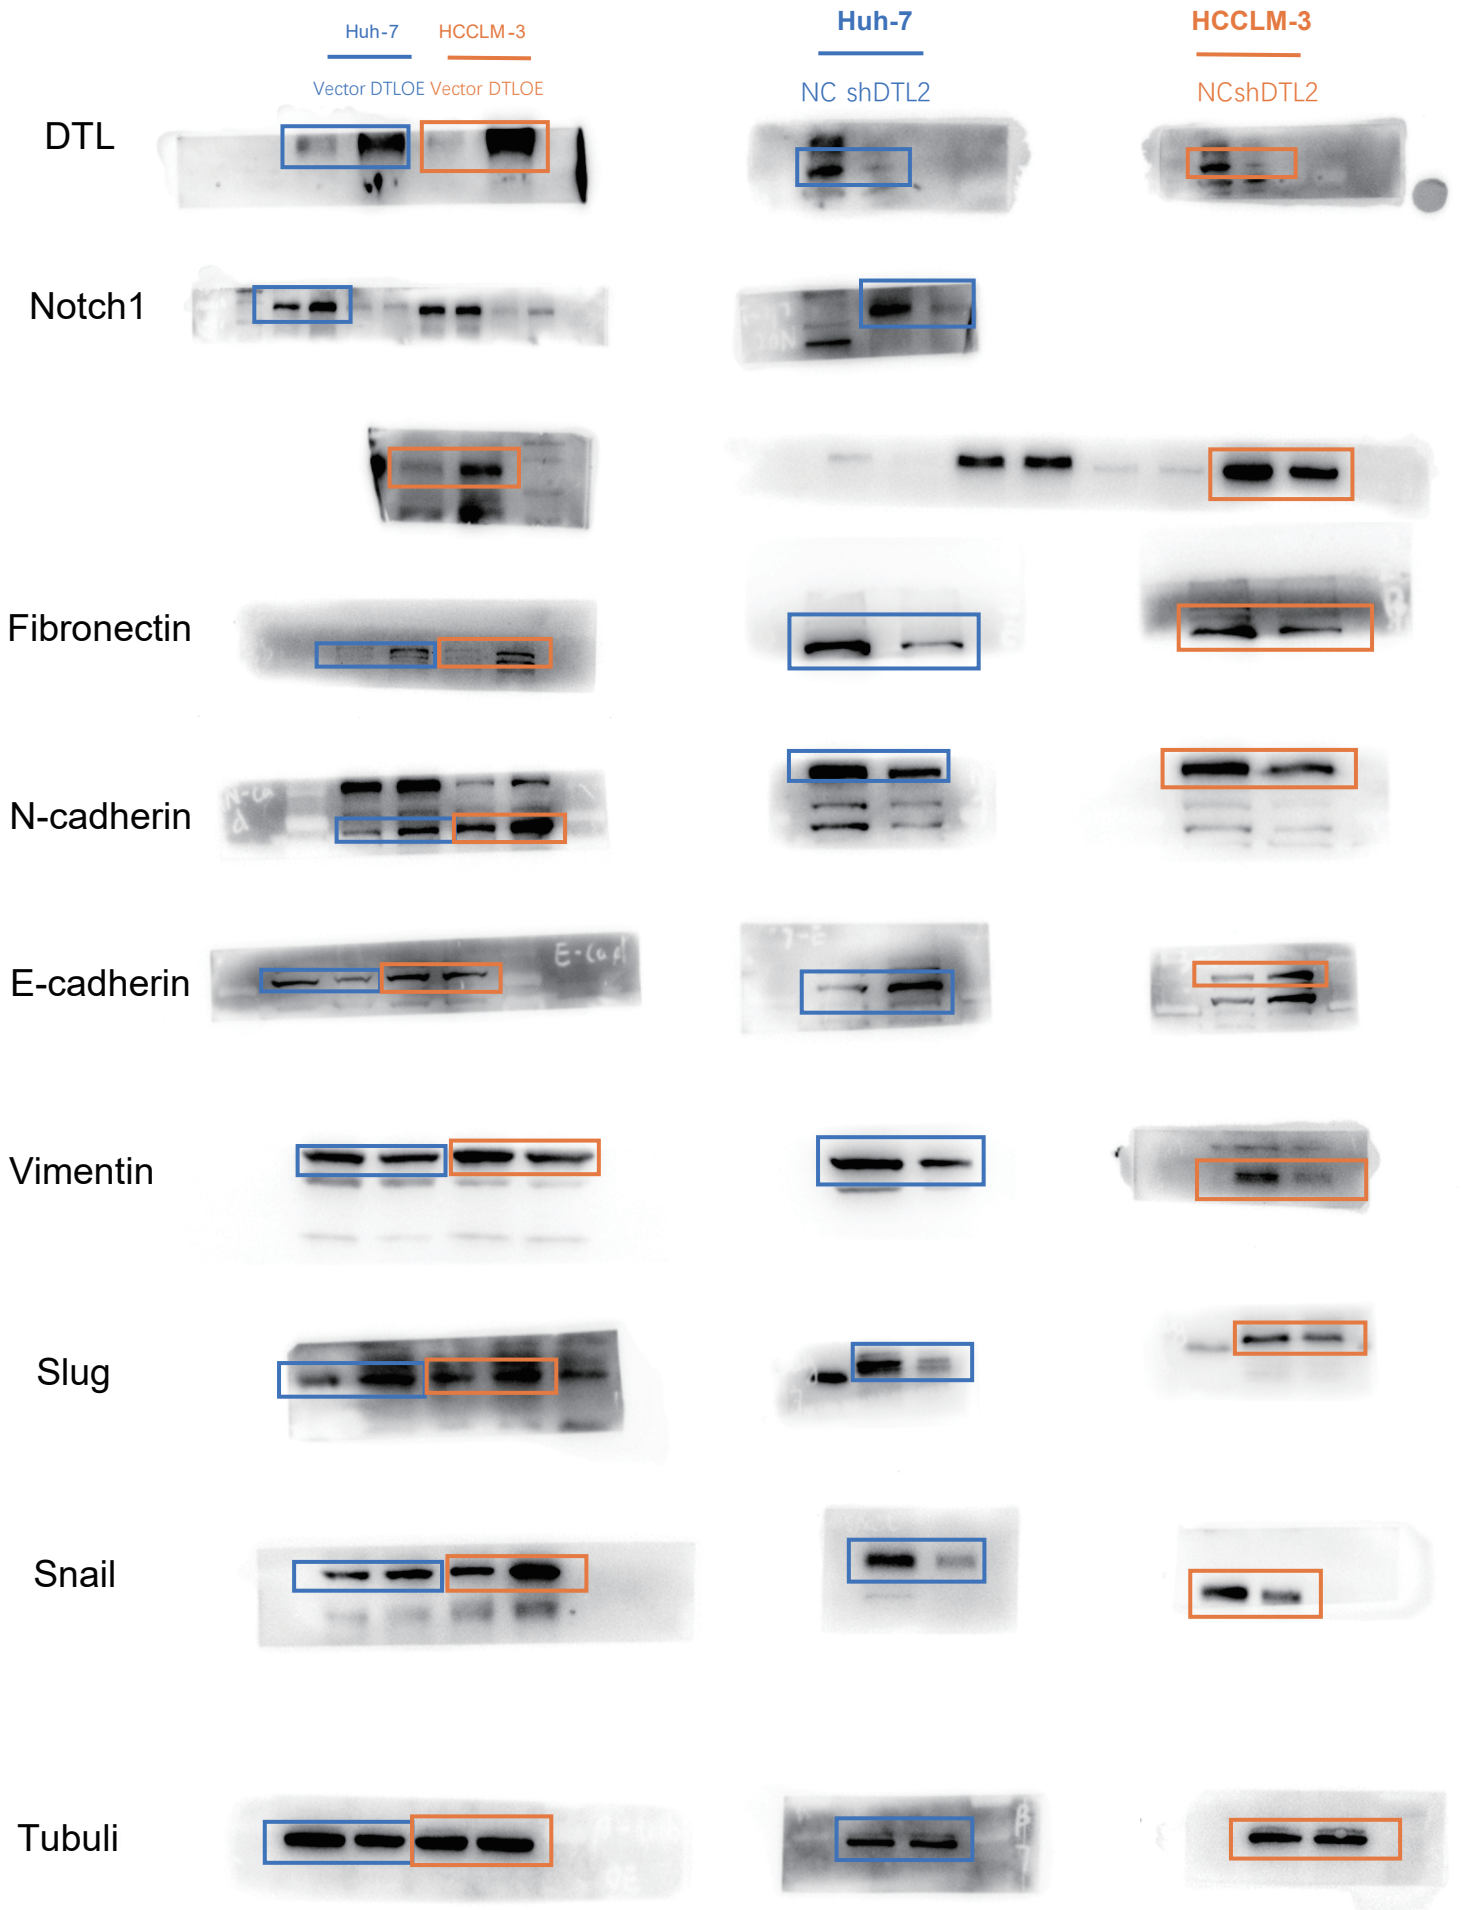

# Full unedited blots for figure 7G

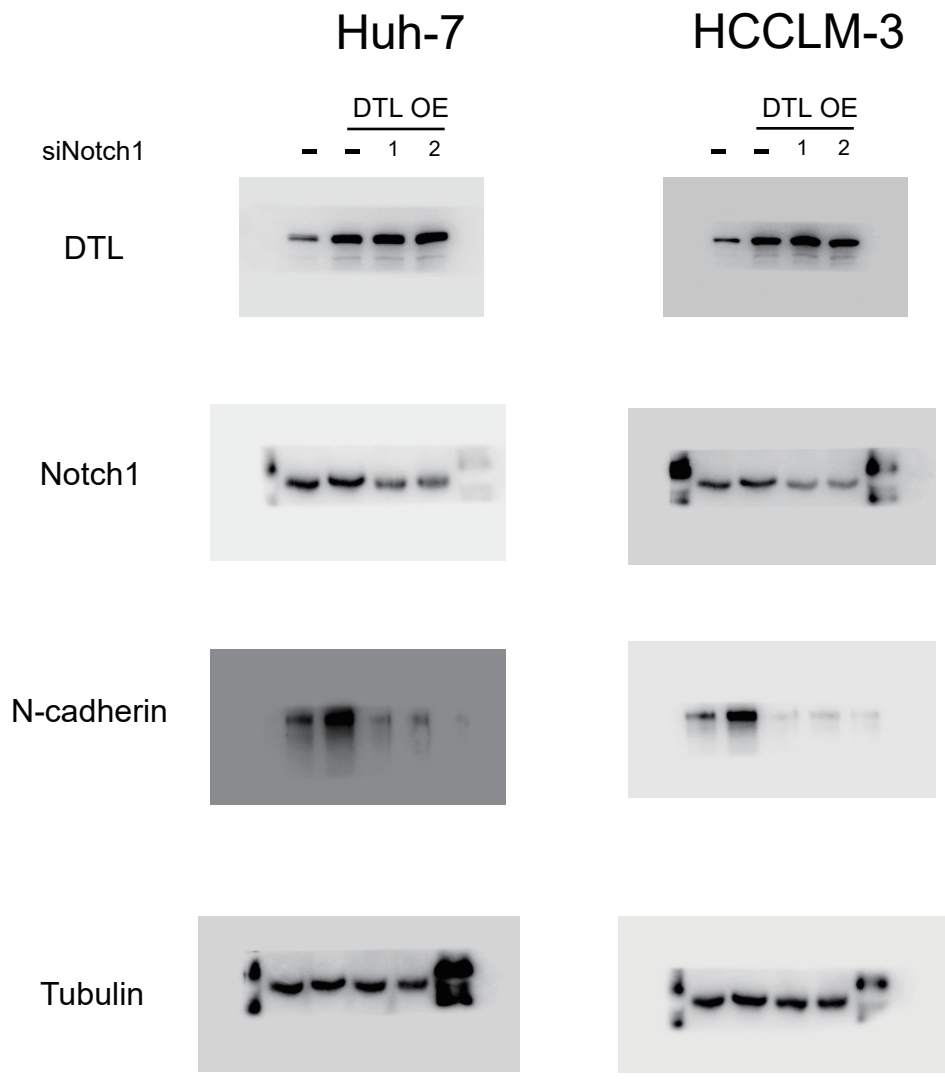

# Full unedited blots for figure 8A-C

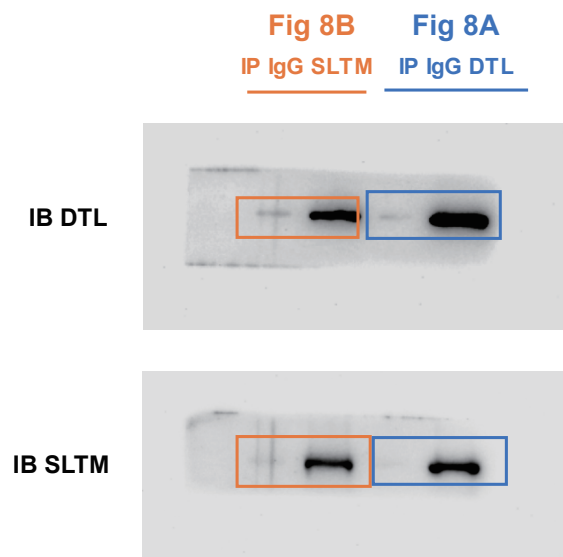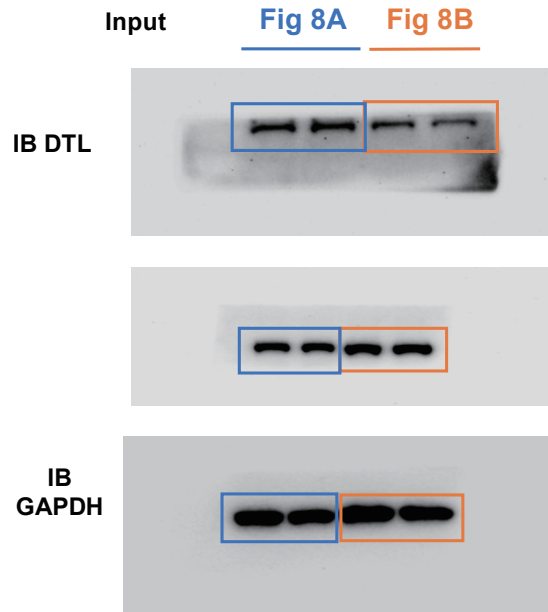

## Fig 8C

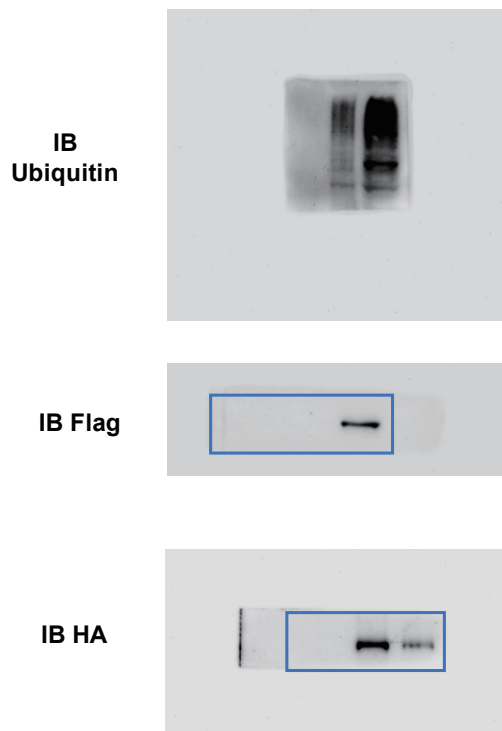

Full unedited blots for figure 8E-F

Fig 8E

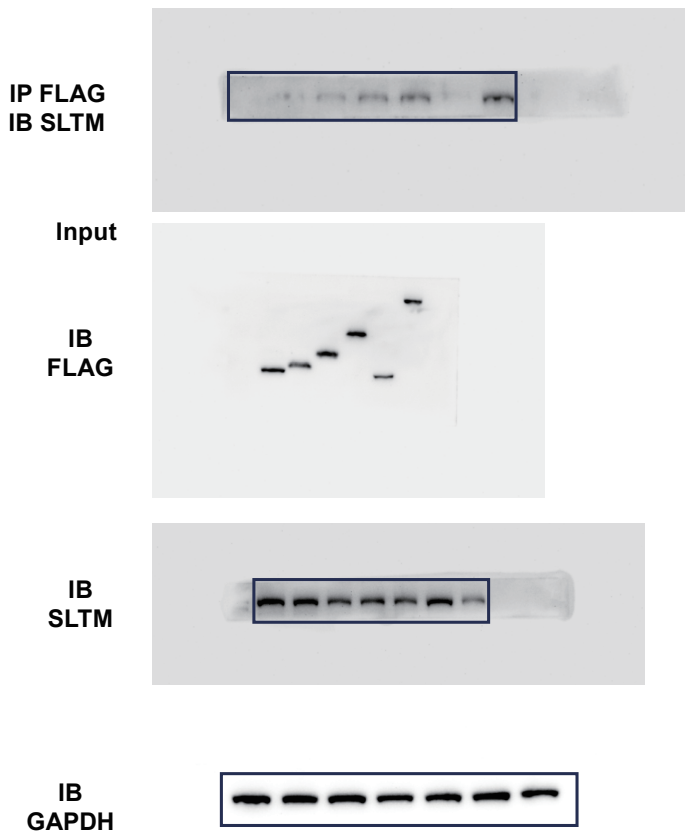

Fig 8F

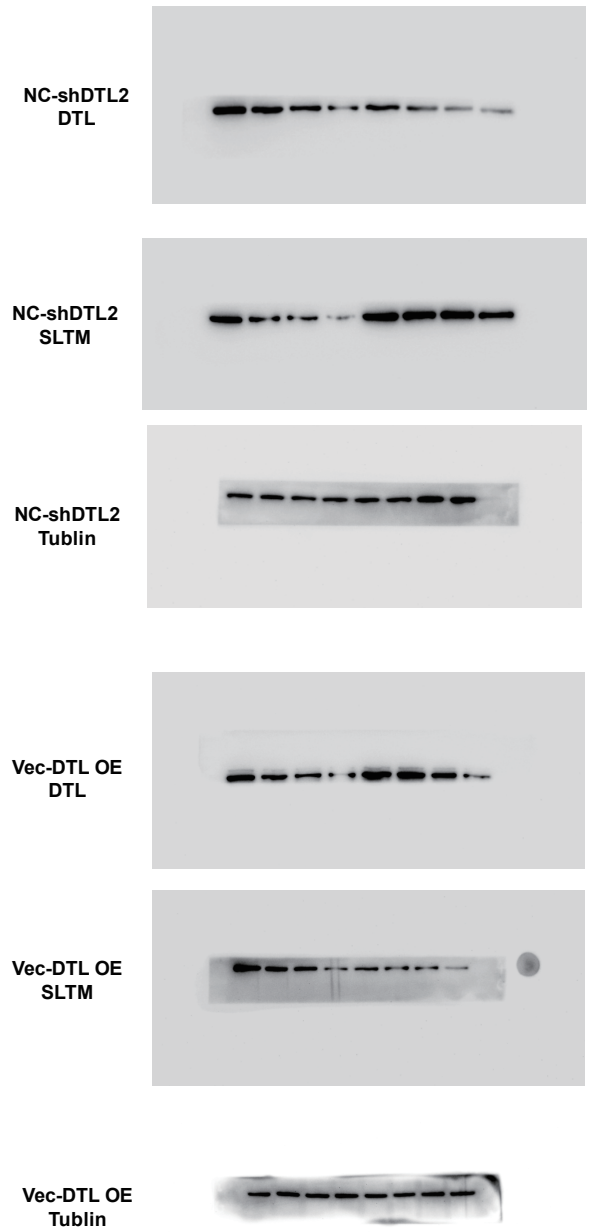

Full unedited blots for figure 8H

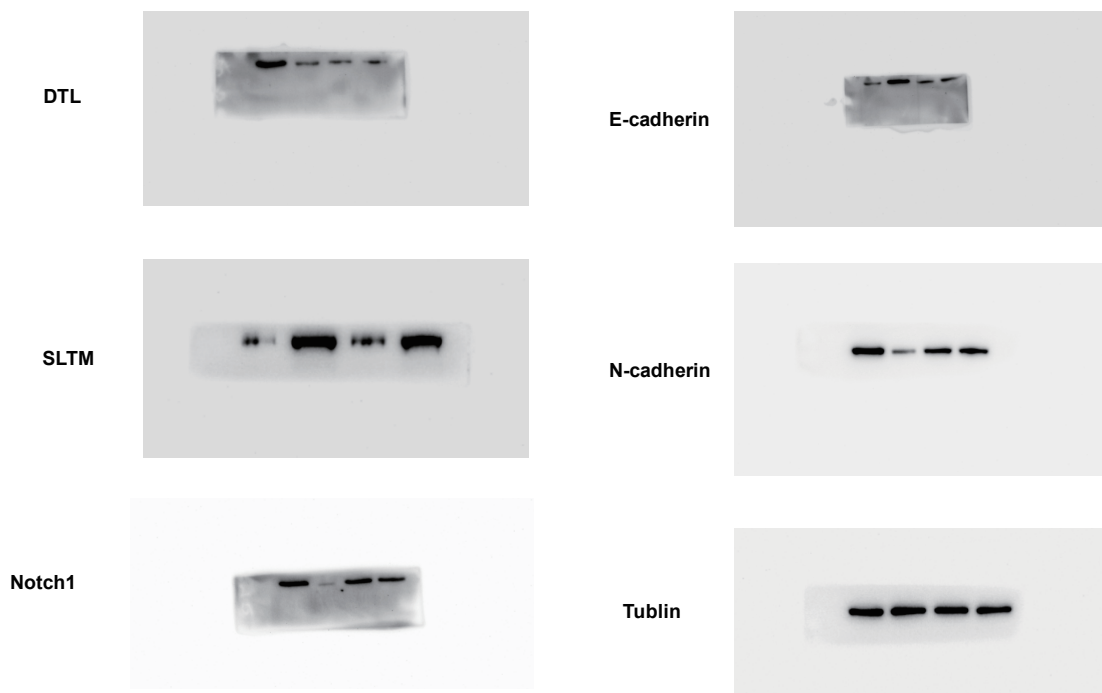

Full unedited blots for Supplementary Fig. 7A

Flag

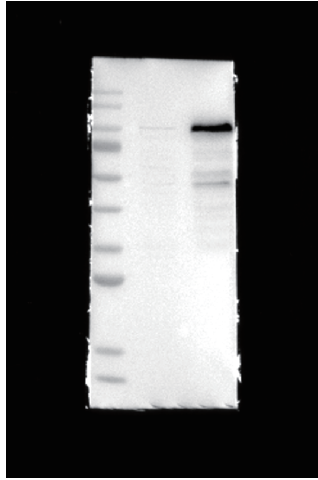

DTL

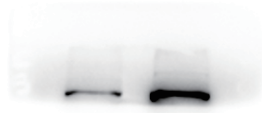

Tublin

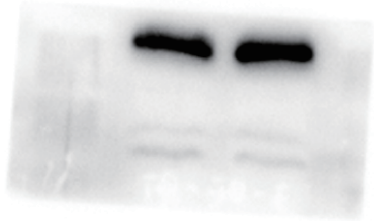

Supplement: 41419_2024_7089_MOESM2_ESM.pdf [file 41419_2024_7089_MOESM2_ESM.pdf]
