# Supplementary material for: Hypoxia-induced DTL promotes the proliferation, metastasis, and sorafenib resistance of hepatocellular carcinoma through ubiquitin-mediated degradation of SLTM and subsequent Notch pathway activation
Source: PubMed Central journal article supplement (PMC11464529; doi:10.1038/s41419-024-07089-4), 2024-10-09
Supplement: 41419_2024_7089_MOESM1_ESM.pdf [file 41419_2024_7089_MOESM1_ESM.pdf]

Supplementary Table 1: Correlation analysis between the clinical features and DTL expression in HCC

| Characteristics of patients |         | DTL Level   |             | P.overall         |
|-----------------------------|---------|-------------|-------------|-------------------|
|                             |         | Low (N=169) | High (N=40) |                   |
| Sex                         | Male    | 145 (85.8%) | 33 (82.5%)  | 0.779             |
|                             | Female  | 24 (14.2%)  | 7 (17.5%)   |                   |
| Age                         | <50     | 69 (40.8%)  | 23 (57.5%)  | 0.083             |
|                             | ≥50     | 100 (59.2%) | 17 (42.5%)  |                   |
| Tumor size                  | <3.0cm  | 70 (41.4%)  | 14 (35.0%)  | 0.572             |
|                             | ≥3.0cm  | 99 (58.6%)  | 26 (65.0%)  |                   |
| Tumor differentiation       | I/II    | 96 (57.4%)  | 19 (47.5%)  | 0.339             |
|                             | III/IV  | 93 (44.5%)  | 21 (52.5%)  |                   |
| Vascular invasion           | Present | 58 (34.3%)  | 26 (65.0%)  | <b>&lt;0.001*</b> |
|                             | Absent  | 111 (65.7%) | 14 (35.0%)  |                   |
| Tumor number                | <3      | 162 (95.9%) | 35 (87.5%)  | 0.056             |
|                             | ≥3      | 7 (4.14%)   | 5 (12.5%)   |                   |
| AFP level                   | <400    | 124 (73.4%) | 23 (57.5%)  | 0.074             |
|                             | ≥400    | 45 (26.6%)  | 17 (42.5%)  |                   |
| Liver cirrhosis             | Present | 105 (62.1%) | 22 (55.0%)  | 0.515             |
|                             | Absent  | 64 (37.9%)  | 18 (45.0%)  |                   |
| Child-pugh class            | A       | 160 (94.7%) | 39 (97.5%)  | 0.691             |
|                             | B       | 9 (5.33%)   | 1 (2.50%)   |                   |
| TNM                         | I/II    | 112 (66.3%) | 14 (35.0%)  | <b>&lt;0.001*</b> |
|                             | III/IV  | 57 (33.7%)  | 26 (65.0%)  |                   |

HCC, hepatocellular carcinoma; AFP, alpha-fetoprotein; TNM tumor-node-metastasis. Significant values are in bold.

Supplementary Table 2: Multivariate Analyses of Predictors of Overall Survival

| Risk Factor           | Univariate |               |                   | Multivariate |             |                   |
|-----------------------|------------|---------------|-------------------|--------------|-------------|-------------------|
|                       | HR         | 95%CI         | <i>P</i> value    | HR           | 95%CI       | <i>P</i> value    |
| Sex                   | 2.466      | 0.764 - 7.956 | 0.131             |              |             |                   |
| Age                   | 0.5239     | 0.290-0.948   | <b>0.033*</b>     | 0.649        | 0.352-1.197 | 0.166             |
| Liver cirrhosis       | 1.063      | 0.586-1.931   | 0.840             |              |             |                   |
| Child-pugh class      | 0.857      | 0.208-3.539   | 0.831             |              |             |                   |
| AFP level             | 1.789      | 0.985-3.248   | 0.056             |              |             |                   |
| Tumor differentiation | 2.281      | 1.248-4.168   | <b>0.007*</b>     | 1.823        | 0.978-3.398 | 0.059             |
| Tumor size            | 3.434      | 1.598-7.376   | <b>0.002*</b>     | 2.869        | 1.264-6.514 | <b>0.012*</b>     |
| Tumor number          | 1.677      | 0.600-4.684   | 0.324             |              |             |                   |
| Vascular invasion     | 0.390      | 1.215-0.709   | <b>0.002*</b>     | /            | /           | 1                 |
| TNM                   | 2.623      | 1.444-4.765   | <b>0.002*</b>     | /            | /           | 1                 |
| DTL Level             | 4.333      | 2.382-7.883   | <b>&lt;0.001*</b> | 3.261        | 1.720-6.185 | <b>&lt;0.001*</b> |

Abbreviations: HR, hazard ratio; AFP, Alpha-fetoprotein; TNM tumor-node-metastasis  
 \**P* value  $\leq 0.05$  was considered to indicate statistical significance.

Supplementary Table 3: Multivariate Analyses of Predictors of Disease-free Survival

| Risk Factor           | Univariate |             |                   | Multivariate |             |                   |
|-----------------------|------------|-------------|-------------------|--------------|-------------|-------------------|
|                       | HR         | 95%CI       | <i>P</i> value    | HR           | 95%CI       | <i>P</i> value    |
| Sex                   | 1.294      | 0.708-2.368 | 0.402             |              |             |                   |
| Age                   | 1.156      | 0.771-1.733 | 0.484             |              |             |                   |
| Liver cirrhosis       | 0.137      | 0.768-1.712 | 0.505             |              |             |                   |
| Child-pugh class      | 0.739      | 0.272-2.011 | 0.554             |              |             |                   |
| AFP level             | 1.158      | 0.754-1.778 | 0.503             |              |             |                   |
| Tumor differentiation | 0.267      | 0.880-1.938 | <b>0.184*</b>     | 1.869        | 1.003-3.485 | <b>0.049*</b>     |
| Tumor size            | 1.647      | 1.080-2.510 | <b>0.021*</b>     | 2.806        | 1.232-6.391 | <b>0.014*</b>     |
| Tumor number          | 1.355      | 0.628-2.928 | 0.439             |              |             |                   |
| Vascular invasion     | 0.363      | 0.243-0.542 | <b>&lt;0.001*</b> | /            | /           | 1                 |
| TNM                   | 2.675      | 1.795-3.986 | <b>&lt;0.001*</b> | /            | /           | 1                 |
| DTL Level             | 2.205      | 1.397-3.480 | <b>&lt;0.001*</b> | 3.60         | 1.942-6.659 | <b>&lt;0.001*</b> |

Abbreviations: HR, hazard ratio; AFP, Alpha-fetoprotein; TNM tumor-node-metastasis  
 \**P* value  $\leq$  0.05 was considered to indicate statistical significance.

Supplementary Table 4: Primer sequences for plasmid construction

| Primer name                   | Sequence                                                                                                                       |
|-------------------------------|--------------------------------------------------------------------------------------------------------------------------------|
| DTL WT<br>Forward             | 5'- G T A C T C G A G A T G C T C T T C A A T T C G G T G C T -3'                                                              |
| DTL WT<br>Reverse             | 5'- G T A G G A T C C C T A T A A T T C T G T T G A G T G T T -3'                                                              |
| HIF-1 $\alpha$ WT<br>Forward  | 5'-G T A G G T A C C A A T A A G T G G T G G T T A C T C A G C A C -3'                                                         |
| HIF-1 $\alpha$ WT<br>Reverse  | 5'-G T A G G G C C C C C T G G T C C A C A G A A G A T G T T T A -3'                                                           |
| Notch1 WT<br>Forward          | 5'- C T C T A G A G A T G A C T A G T G C C T C G G C C -3'                                                                    |
| Notch1 WT<br>Reverse          | 5'-G G A A T T C C T G G A A G C C A G A T C A C C A T C A G -3'                                                               |
| shDTL NC<br>Forward           | 5'- C C G G A C G C A T G C A T G C T C A G T G C T T C T C G<br>A G A A G C A C T G A G C A T G C A T G C G T T T T T T G -3' |
| shDTL NC<br>Reverse           | 5'- A A T T C A A A A A C G C A T G C A T G C T C A G T G C<br>T T C T C G A G A A G C A C T G A G C A T G C A T G C G T -3'   |
| shDTL1<br>Forward             | 5'- C C G G C C T G G T G A A C T T A A A C T T G T T C T C G<br>A G A A C A A G T T T A A G T T C A C C A G G T T T T T G -3' |
| shDTL1<br>Reverse             | 5'- A A T T C A A A A A C C T G G T G A A C T T A A A C T T G<br>T T C T C G A G A A C A A G T T T A A G T T C A C C A G G -3' |
| shDTL2<br>Forward             | 5'- C C G G G C C T A G T A A C A G T A A C G A G T A C T C G<br>A G T A C T C G T T A C T G T T A C T A G G C T T T T T G -3' |
| shDTL2<br>Reverse             | 5'- A A T T C A A A A A G C C T A G T A A C A G T A A C G A G<br>T A C T C G A G T A C T C G T T A C T G T T A C T A G G C -3' |
| DTL promoter<br>Forward       | 5'-C T A G C T A G C T A G G T A T C A G A A T G A G G A G G A A A G T G -3'                                                   |
| DTL promoter<br>Reverse       | 5'- C C G C T C G A G C G G G G G A G A A C T C A G A A G C T G A G -3'                                                        |
| Notch1<br>promoter<br>Forward | 5'-G G C T A G C C A T G C A A A C C A G G C T C T G C G G -3'                                                                 |
| Notch1<br>promoter<br>Reverse | 5'-G G A A T T C C A C C G G C T G C C C T C T G -3'                                                                           |
| DTL-CHIP-P1<br>Forward        | 5'- G A G C T C G C T A C T T G T T T A G C -3'                                                                                |
| DTL-CHIP-P1<br>Reverse        | 5'- C A G G A A C T G G A T G C C A A C T C -3'                                                                                |
| DTL-CHIP-P2<br>Forward        | 5'- G T C A A G C C C T G T T A C G C A T G -3'                                                                                |
| DTL-CHIP-P2<br>Reverse        | 5'- C C A A G T T C A G C A G A A A T C G C -3'                                                                                |
| DTL-P1-mutant<br>Forward      | 5'- G C T C C C C G C C C A G C G A A T G C G C C T A T C C G T C -3'                                                          |
| DTL-P1-<br>mutant Reverse     | 5'- G A C G G A T A G G C G C A T T C G C T G G G C G G G G A G C -3'                                                          |

---

|                                    |                                                                                                                  |
|------------------------------------|------------------------------------------------------------------------------------------------------------------|
| DTL-P2-<br>mutant Forward          | 5'- GACTCTGAGGCGCCTCGGAAGCCAATC-3'                                                                               |
| DTL-P2-<br>mutant Reverse          | 5'- GATTGGCTTCCGAGGCGCCTCAGAGTC-3'                                                                               |
| 3xFlag-DTL<br>Forward              | 5'-GTACTCGAGATGGACTACAAAGACCATGACGGTG<br>ATTATAAAGATCATGACATCGACTACAAGGATGACG<br>ATGACAAGATGCTCTTCAATTCGGTGCT-3' |
| 2xHA-SLTM<br>Forward               | 5'-CTAGCTAGCTAGATGTACCCATACGATGTTCCAGATT<br>ACGCTTACCCATACGATGTTCCAGATTACGCTATG<br>ATTGTGCGCAGCGCTGC-3'          |
| 2xHA-SLTM<br>Reverse               | 5'- GTCGACTTCCAGGTGTGGATTTTTATTTTCAC -3'                                                                         |
| 1xFlag-DTL<br>1-398aa<br>Forward   | 5'- GTAGCTAGCATGGATTACAAGGACGACGATGACAAG<br>ATGCTCTTCAATTCGGTGCT-3'                                              |
| 1xFlag-DTL<br>1-398aa<br>Reverse   | 5'- GTAGGATCCCTAGGTTTCTCCTCTAAGCCTCT-3'                                                                          |
| 1xFlag-DTL<br>1-448aa<br>Reverse   | 5'-GTAGGATCCCTATGCGGATGACGGGGAAG-3'                                                                              |
| 1xFlag-DTL<br>1-498aa<br>Reverse   | 5'- GTAGGATCCCTATTGAAAGATGAAGGTGGCTT-3'                                                                          |
| 1xFlag-DTL<br>1-598aa<br>Reverse   | 5'- GTAGGATCCCTAAGGTCTTCCTGGTTACCAGC-3'                                                                          |
| 1xFlag-DTL<br>398-730aa<br>Forward | 5'- GTAGCTAGCATGGATTACAAGGACGACGATGACAAG<br>GGAGGTGATAAACTTTCCAC-3'                                              |
| 1xFlag-DTL<br>398-730aa<br>Reverse | 5'-GTAGGATCCCTATAATTCTGTTGAGTGTT-3'                                                                              |

---

Supplementary Table 5: Target sequence of siRNA

| Primer name                 | Sequence                       |
|-----------------------------|--------------------------------|
| DTL Si-1 Forward            | 5'- GGUUCCUGGUGAACUAAAACU-3'   |
| DTL Si-1 Reverse            | 5'- UUUAAAGUUCACCAGGAACCCA-3'  |
| DTL Si-2 Forward            | 5'- GGCUCUACUUUAUUUGCUAAU-3'   |
| DTL Si-2 Reverse            | 5'- UAGCAAUAAGUAGAGCCAG-3'     |
| HIF-1 $\alpha$ Si-1 Forward | 5'- GGAAAUGAGAGAAAUGCUUDTDT-3' |
| HIF-1 $\alpha$ Si-1 Reverse | 5'- AAGCAUUUCUCUCAUUUCCDTDC-3' |
| HIF-1 $\alpha$ Si-2 Forward | 5'- GCUGGAGACACAAUCAUAUDTDT-3' |
| HIF-1 $\alpha$ Si-2 Reverse | 5'- AUAUGAUUGUGUCUCCAGCDGDG-3' |
| Notch1 Si-1 Forward         | 5'-GGAGCAUGUGUAACAUCAADTDT-3'  |
| Notch1 Si-1 Reverse         | 5'-UUGAUGUUACACAUGCUCDDTDT-3'  |
| Notch1 Si-2 Forward         | 5'-GUCCAGGAAACAACUGCAADTDT-3'  |
| Notch1 Si-2 Reverse         | 5'-UUGCAGUUGUUUCCUGGACDTDT-3'  |
| SLTM Si-1 Forward           | 5'- GCUGUGUGGUAGUGGUUAAU-3'    |
| SLTM Si-1 Reverse           | 5'- UAAACCACUACCACACAGCUG-3'   |
| SLTM Si-2 Forward           | 5'- GGAAGUACAAGUAGUACUAGU-3'   |
| SLTM Si-2 Reverse           | 5'- UAGUACUACUUGUACUCCUU-3'    |

Supplementary Table 6: Primers for Quantitative Real-time PCR

| Primer name            | Sequence                        |
|------------------------|---------------------------------|
| DTL Forward            | 5'- CCCTTCAAACCCAAGAAGA -3'     |
| DTL Reverse            | 5'- GGTTCTTGTCGATAAGCAGT -3'    |
| HIF-1 $\alpha$ Forward | 5'-CAGCGAAGCTTTTTTCTCAGAATGA-3' |
| HIF-1 $\alpha$ Reverse | 5'- CACAAATCAGCACCAAGC-3'       |
| GAPDH Forward          | 5'- TGTGTCCGTCGTGGATCTGA -3'    |
| GAPDH Reverse          | 5'- TTGCTGTTGAAGTCGCAGGAG -3'   |
| NOTCH Forward          | 5'-GAGGCGTGGCAGACTATGC-3'       |
| NOTCH Reverse          | 5'-CTTGTACTCCGTCAGCGTGA-3'      |
| Fibronectin Forward    | 5'-GGAGGAAGCCGAGGTTTTAAC-3'     |
| Fibronectin Reverse    | 5'-ACGCTCATAAGTGTCACCCA-3'      |
| N-cadherin Forward     | 5'-TCGATTGGTTTGACCACGG-3'       |
| N-cadherin Reverse     | 5'-GACGGTTCGCCATCCAGAC-3'       |
| E-cadherin Forward     | 5'-AGTGGGCACAGATGGTGTGA-3'      |
| E-cadherin Reverse     | 5'-TAGGTGGAGTCCCAGGCGTA-3'      |
| Vimentin Forward       | 5'-TGTCCAAATCGATGTGGATGTTTC-3'  |
| Vimentin Reverse       | 5'-TTGTACCATTCTTCTGCCTCCTG-3'   |
| Slug Forward           | 5'-GACCCTGGTTGCTTCAAGGA-3'      |
| Slug Reverse           | 5'-TGTTGCAGTGAGGGCAAGAA-3'      |
| SNAIL Forward          | 5'-TCGGAAGCCTAACTACAGCGA-3'     |
| SNAIL Reverse          | 5'-AGATGAGCATTGGCAGCGAG-3'      |
| SLTM Forward           | 5'-AGACAGGCGAGAAGTACGAG-3'      |
| SLTM Reverse           | 5'-CTGGTGGGTCTGGAAGGATT-3'      |
| $\beta$ -actin Forward | 5'-CATGTACGTTGCTATCCAGGC-3'     |
| $\beta$ -actin Reverse | 5'-CTCCTTAATGTCACGCACGAT-3'     |

Supplementary Table 7: List of the primary and secondary antibodies used in this study

| Antigen                                             | Species | Source      | Catalog    |
|-----------------------------------------------------|---------|-------------|------------|
| DTL                                                 | Rabbit  | Abcam       | ab174385   |
| HIF-1 $\alpha$                                      | Rabbit  | CST         | #3716      |
| GAPDH                                               | Rabbit  | Proteintech | 10494      |
| $\beta$ -tubulin                                    | Rabbit  | CST         | #2128      |
| Fibronectin                                         | Mouse   | Proteintech | 15613      |
| N-cadherin                                          | Rabbit  | Affinity    | AF5239     |
| E-cadherin                                          | Rabbit  | Affinity    | AF0131     |
| Vimentin                                            | Rabbit  | Proteintech | 10366      |
| Slug                                                | Rabbit  | Proteintech | 12129      |
| Snail                                               | Rabbit  | Proteintech | 13099      |
| Notch1                                              | Rabbit  | Abcam       | EP1238Y    |
| FLAG                                                | Mouse   | Proteintech | 66008      |
| HA                                                  | Rabbit  | Proteintech | 81290      |
| SLTM                                                | Rabbit  | Novus       | NBP1-47300 |
| Ubiquitin                                           | Rabbit  | Proteintech | 10201      |
| HRP-conjugated Goat Anti-Rabbit IgG (H+L)           | Goat    | Proteintech | SA00001-2  |
| HRP-conjugated Affinipure Goat Anti-Mouse IgG (H+L) | Goat    | Proteintech | SA00001-1  |
| Goat Anti-Rabbit IgG (H+L) Flour 488-conjugated     | Goat    | Affinity    | S0018      |
| Goat Anti-Rabbit IgG (H+L) Flour 594-conjugated     | Goat    | Affinity    | S0006      |



1 Supplementary Figure 1: (A) Heatmap of DEGs for GSE102079, GSE112790, and  
2 GSE25097 datasets from GEO, respectively. (B-D). Volcano plot of hepatocellular  
3 carcinoma (HCC) vs. adjacent nontumor, portal vein tumor thrombosis (PVTT) vs.  
4 adjacent nontumor, and PVTT vs HCC, respectively.

5

6 Supplementary Figure 2: (A) DTL mRNA levels between HCC samples and matched  
7 liver tissue (n=50) from the TCGA database. (B) Kaplan-Meier survival analysis of OS  
8 for HCC patients with high and low expression of DTL from TCGA database. (C-E)  
9 DTL mRNA levels among different histological grade (C), pathologic T stage (D), and  
10 pathologic N stage (E) in the TCGA-LIHC cohort. (F) The capacity to identify tumor  
11 or normal tissue sources of DTL in the TCGA-LIHC cohort. \*P < 0.05, \*\*P < 0.01,  
12 \*\*\*P < 0.001, ns, no significance

13

14 Supplementary Figure 3: Spearman correlation analysis between DTL and pathway  
15 score.<sup>52</sup> The signal pathway positively correlated with the overexpression of DTL.

16

17 Supplementary Figure 4: (A) The mRNA level of HIF-1 $\alpha$  and DTL was determined  
18 after HIF-1 $\alpha$ -siRNA transfection or KC7F2 (40  $\mu$ M) treatment under hypoxia (1% O<sub>2</sub>)  
19 in HCCLM-3 cells. (B) The protein level of HIF-1 $\alpha$  and DTL was quantified after HIF-  
20 1 $\alpha$ -siRNA transfection or KC7F2 (40  $\mu$ M) treatment under hypoxia (1% O<sub>2</sub>) in Huh-7  
21 and HCCLM-3 cells. (C) The effectiveness of doxycycline-induced DTL knockdown  
22 in Huh-7 and HCCLM-3 cells was detected in various concentrations. Knockdown of

1 DTL was mediated by treatment with 1.0  $\mu\text{g}/\text{mL}$  doxycycline for 48 h in further  
2 experiments. (D) Representative Flow Cytometry Analysis of Cell Cycle Distribution  
3 in Huh-7 and HCCLM-3 Cells Following Overexpression and Knockdown of DTL.

4

5 Supplementary Figure 5: (A) Transwell assays were performed to evaluate the invasion  
6 ability of DTL overexpression and knockdown HCC cells. (B) Representative images  
7 of wound healing assay in HCC cells. (C) Representative images of lung tissues in tail  
8 vein tumor metastasis mouse model from DTL knockdown and negative control (NC)  
9 groups. (D) Representative images of liver tissues in orthotopic liver transplantation  
10 model from DTL knockdown and negative control (NC) groups. (E) Liver weight in  
11 orthotopic liver transplantation model. (F) Representative images of intrahepatic  
12 metastasis nodules in HE-stained sections. Left panel: the number of intrahepatic  
13 metastasis nodules in the DTL overexpression group. (G and H) Representative images  
14 of lung tissues in orthotopic liver transplantation model from DTL overexpression (G)  
15 and knockdown (H) groups.

16

17 Supplementary Figure 6: (A) The immunofluorescence results of Notch1 and N-  
18 cadherin expression in DTL overexpressing or knockdown Huh-7 cells. (B) The  
19 knockdown efficiency of Notch1 by siRNA was detected by qRT-PCR in HCCLM-3  
20 cells. (C) The functional role of Notch1 in the DTL-induced proliferation of HCCLM-  
21 3 cells was detected by Cell Counting Kit-8 (CCK8) (D). The functional role of Notch1  
22 in DTL-induced metastasis of HCCLM-3 cells was detected by wound-healing assays.

1 (E) Representative images of transwell assays demonstrating the effect of Notch1  
2 knockdown on the metastasis and invasiveness of DTL-overexpressing Huh-7 Cells. (F)  
3 Transwell assays representative images and statistical outcomes assessing the impact  
4 of Notch1 knockdown on the metastasis and invasiveness properties of HCCLM-3 cells  
5 with DTL overexpression. (G) CCK-8 assay evaluating HCCLM-3 cells viability under  
6 DTL overexpression or hypoxia with Notch1 knockdown and sorafenib (3 $\mu$ M)  
7 treatment. \*P < 0.05, \*\*P < 0.01, \*\*\*P < 0.001, ns, no significance

8

9 Supplementary Figure 7: (A) Validation of 3xFlag-DTL overexpression in Huh-7 cells  
10 using Western blot. (B) The top 20 proteins interacting with DTL, identified through  
11 liquid chromatography-tandem mass spectrometry (LC-MS/MS) analysis.

12

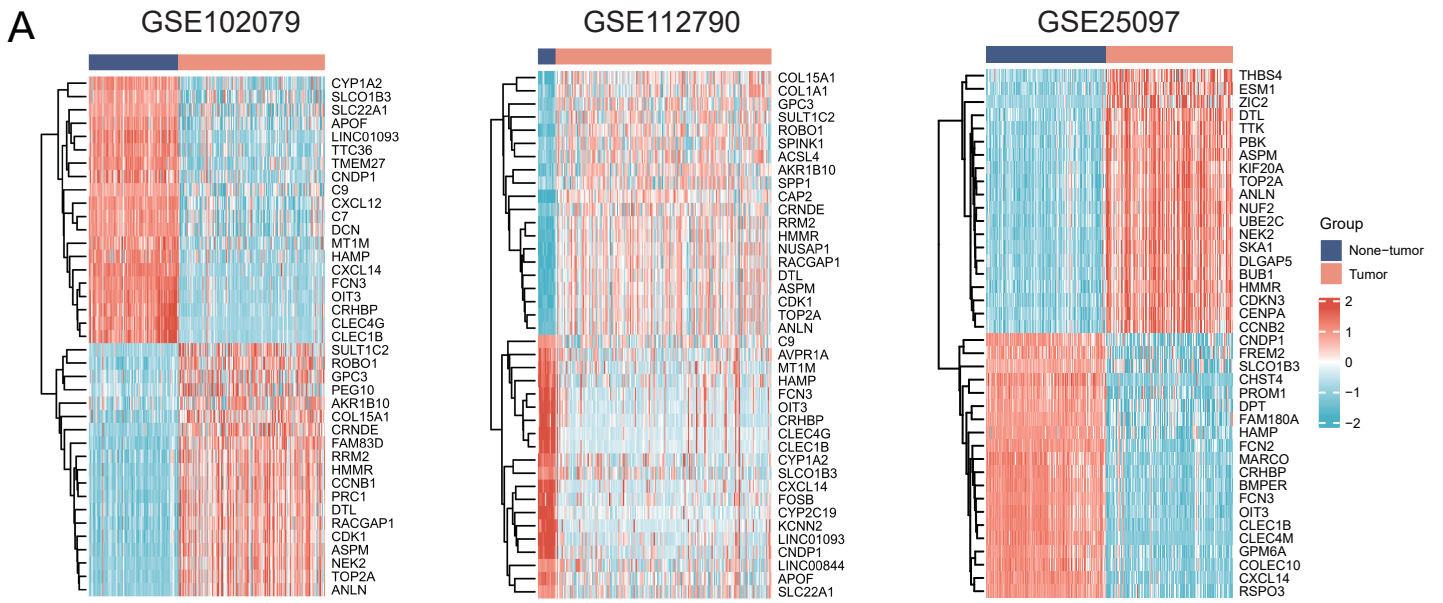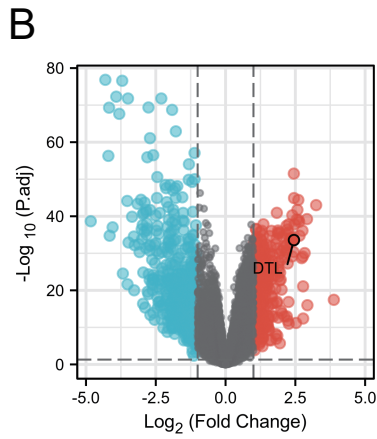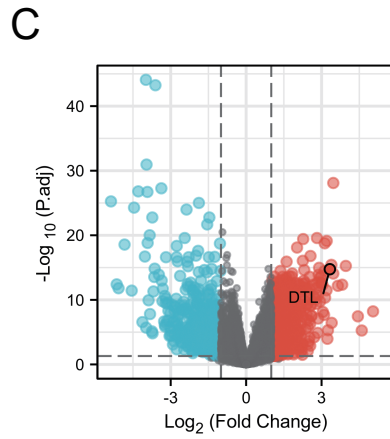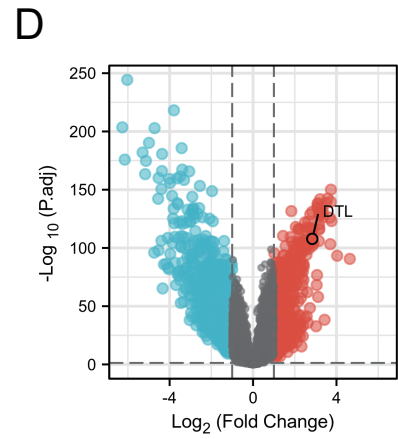

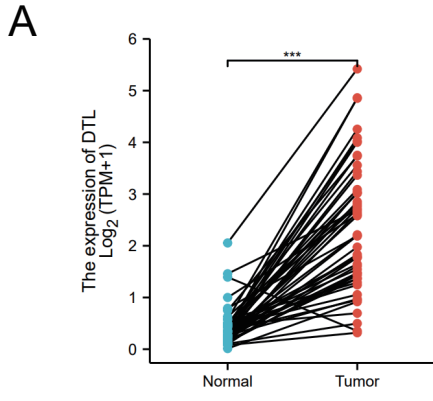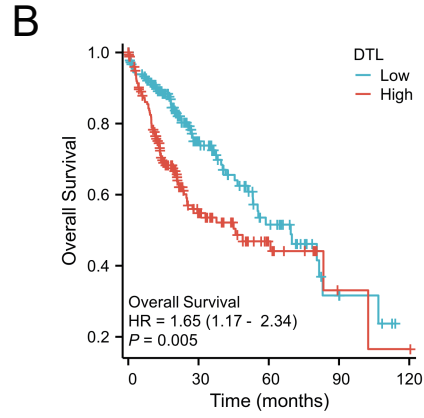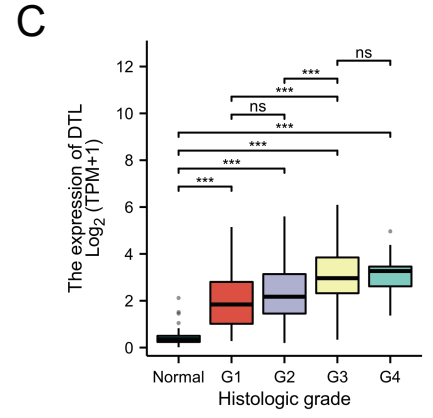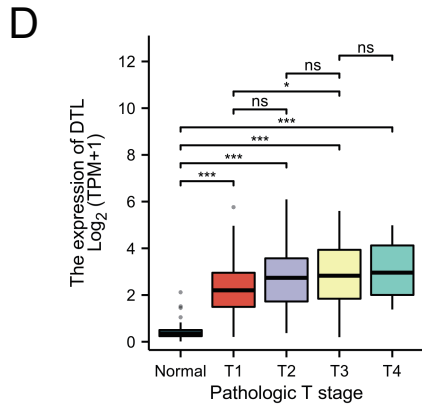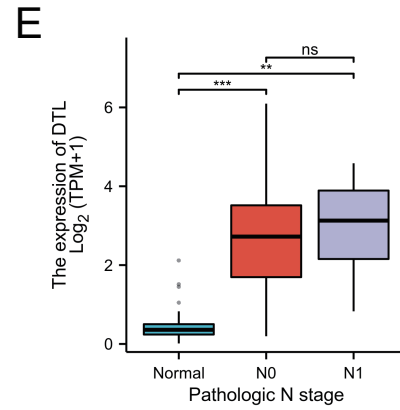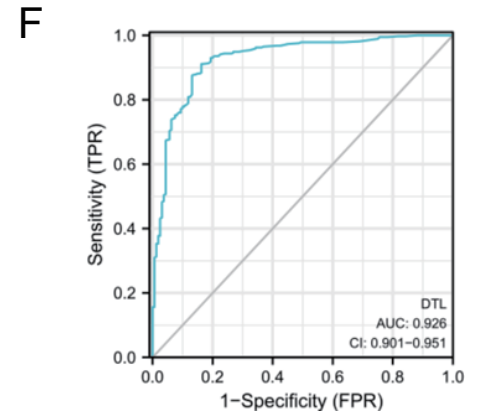

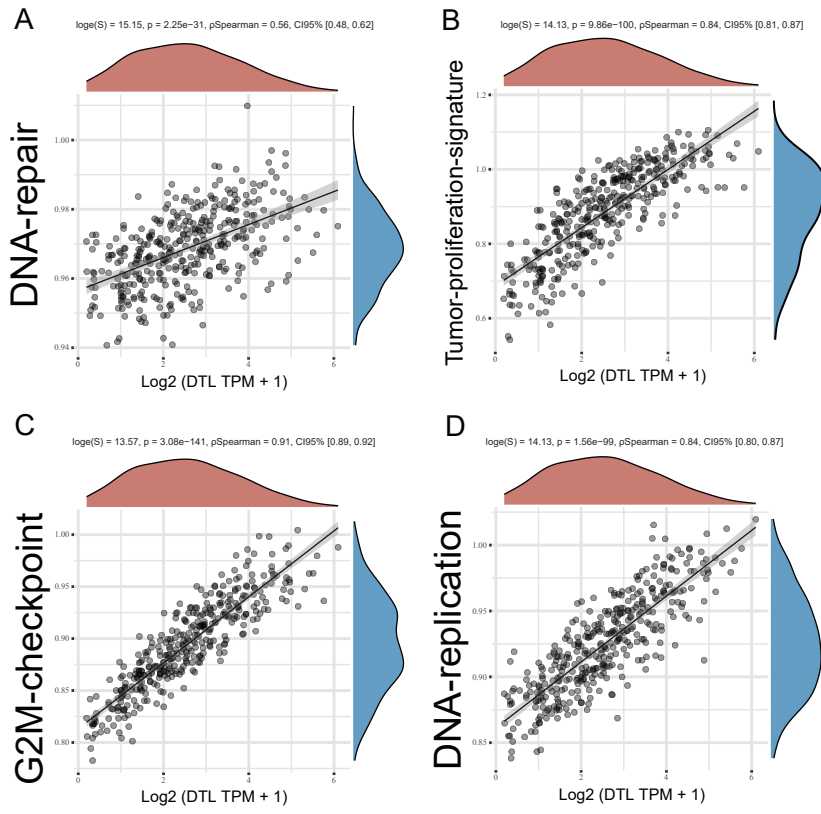

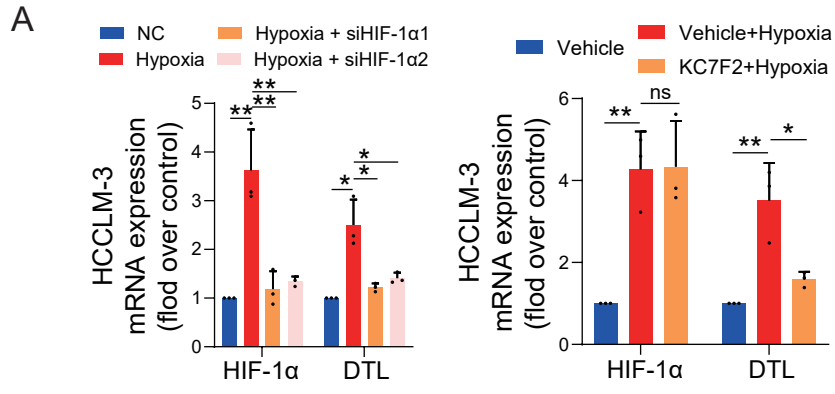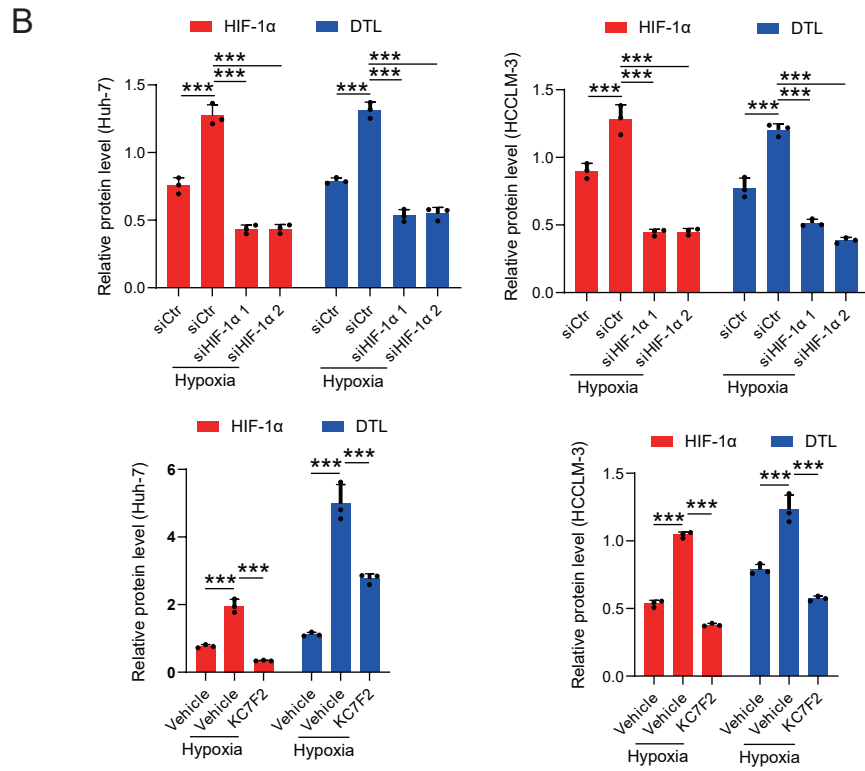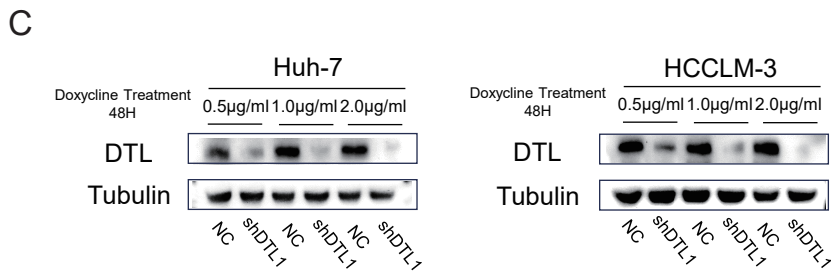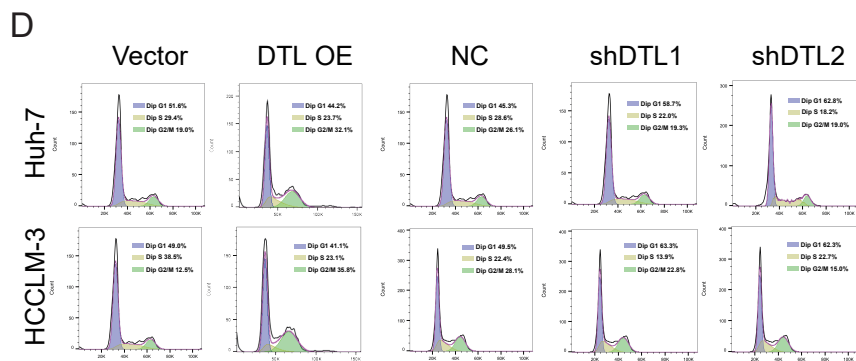

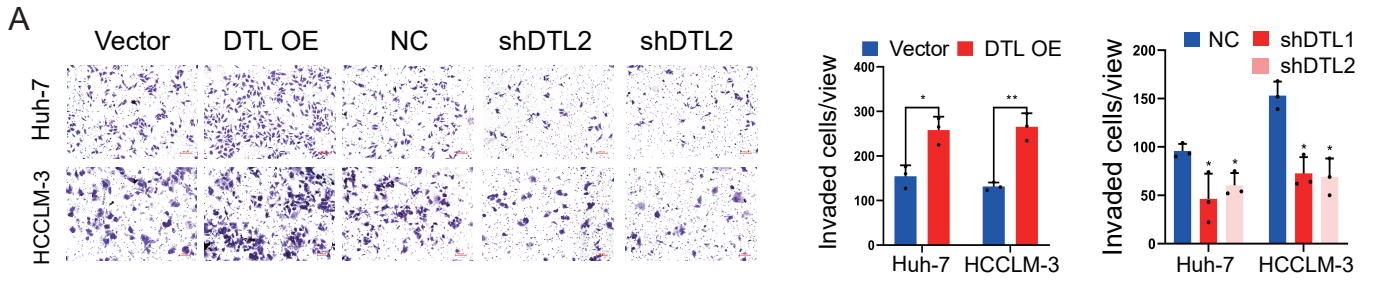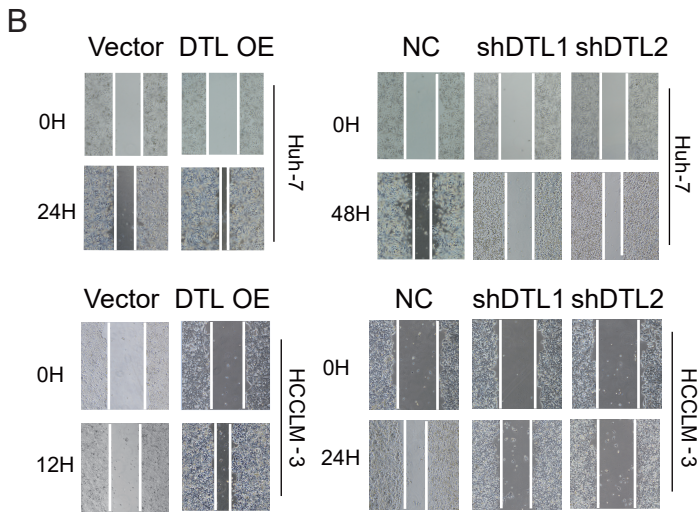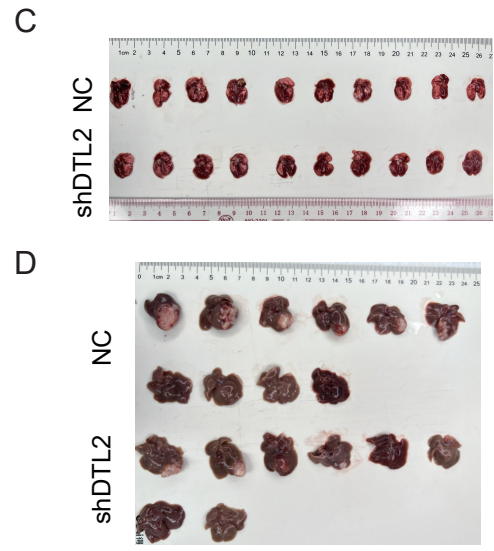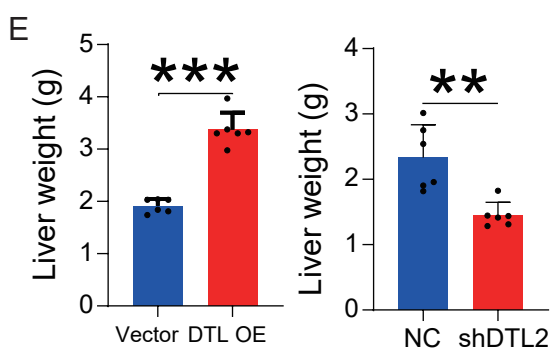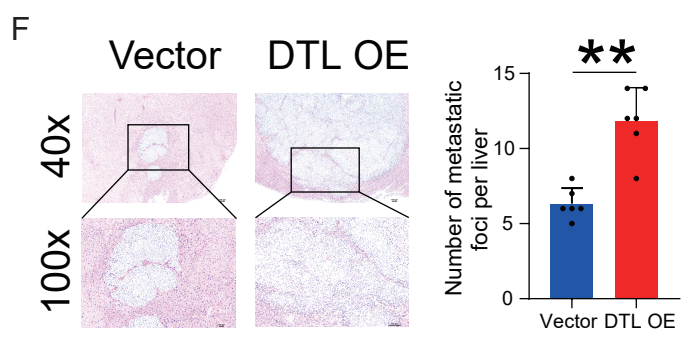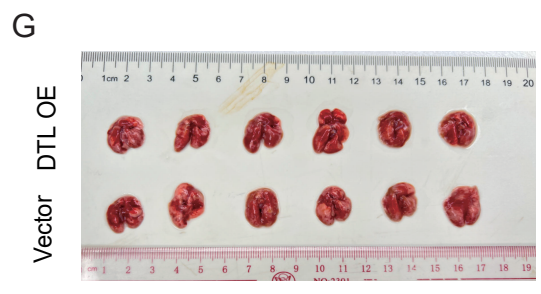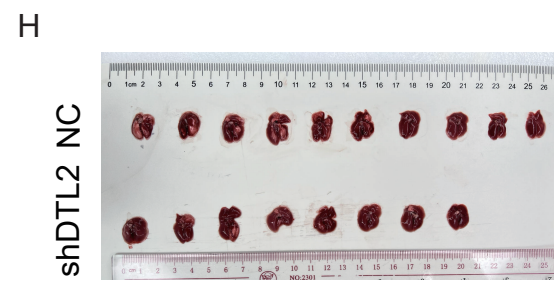



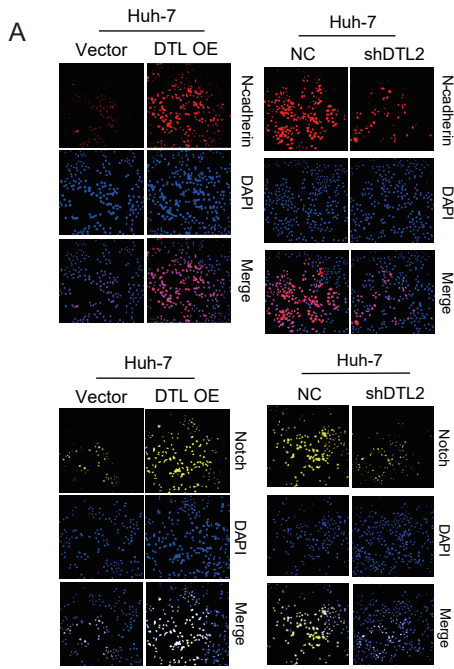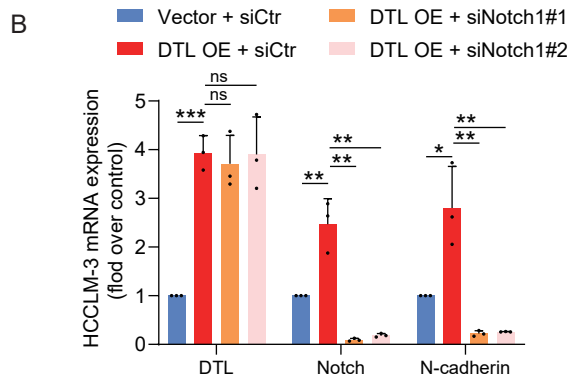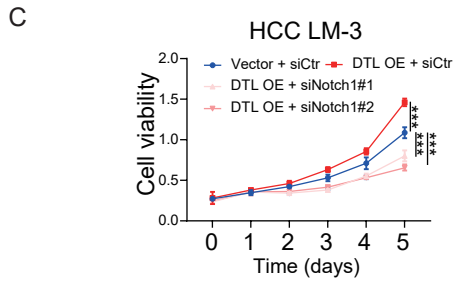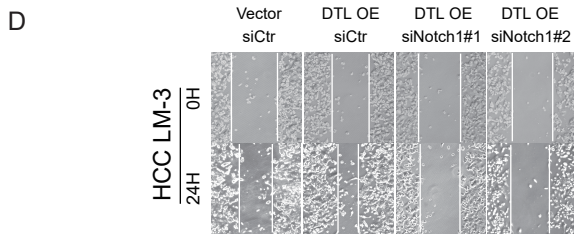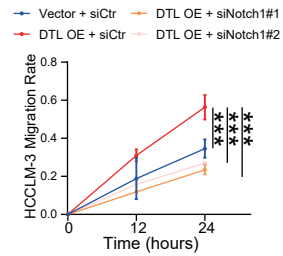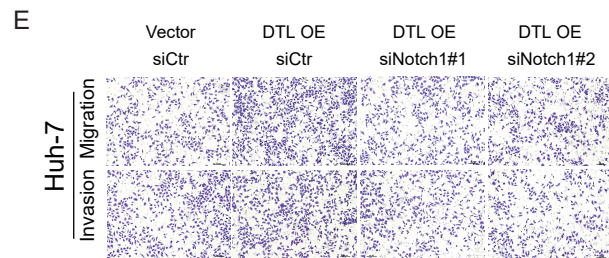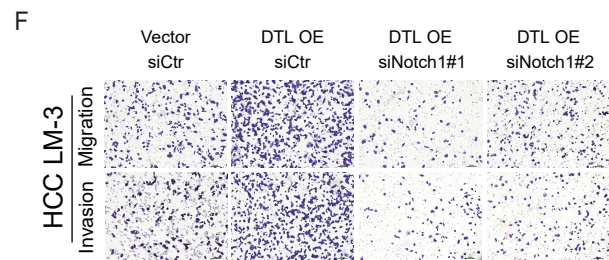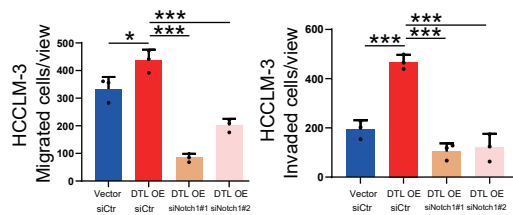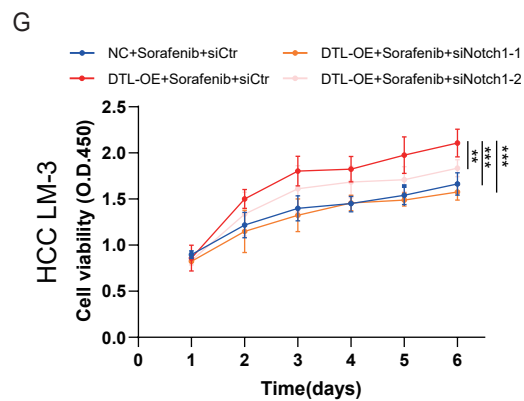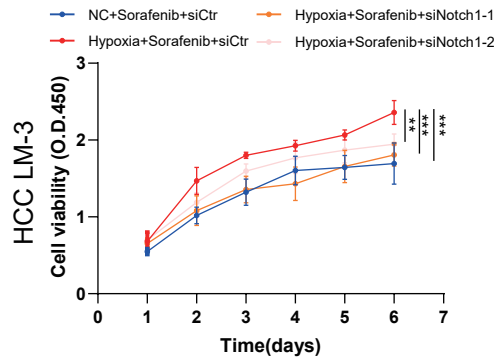

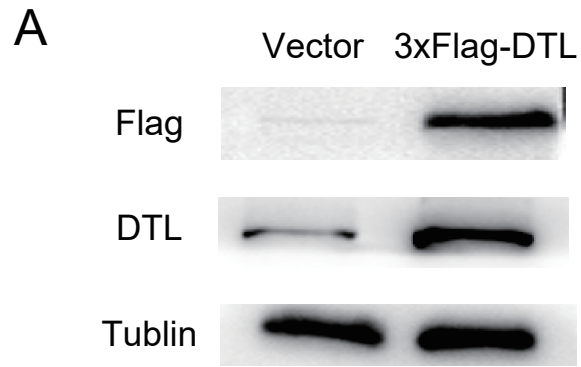

**B** Mass spectrometric identification of the proteins bound to DTL.

| Number | Citable Accession | Gene name |
|--------|-------------------|-----------|
| 1      | Q14684            | RRP1B     |
| 2      | Q8TDD1            | DDX54     |
| 3      | P46013            | MKI67     |
| 4      | Q9NZJ0            | DTL       |
| 5      | O00560            | SDCBP     |
| 6      | O15213            | WDR46     |
| 7      | P55081            | MFAP1     |
| 8      | Q1ED39            | KNOP1     |
| 9      | Q06787            | FMR1      |
| 10     | Q9NWH9            | SLTM      |
| 11     | Q13595            | TRA2A     |
| 12     | Q7Z6E9            | RBBP6     |
| 13     | Q9NWB6            | ARGLU1    |
| 14     | Q8NC51            | SERBP1    |
| 15     | P46778            | RPL21     |
| 16     | Q9BYG3            | NIFK      |
| 17     | Q13601            | KRR1      |
| 18     | P62910            | RPL32     |
| 19     | P62136            | PPP1CA    |
| 20     | Q8NI27            | THOC2     |
